# Supplementary material
Source: ML conference proceedings conference paper supplement (https://proceedings.mlr.press/v51/nishiyama16.html)
Supplement: Supplementary file 1 [file nishiyama16-supp.zip]

Archive with 10 entries (7 files):
- 198-supp/
- 198-supp/.DS_Store
- __MACOSX/
- __MACOSX/198-supp/
- __MACOSX/198-supp/._.DS_Store
- 198-supp/198-supp.pdf
- __MACOSX/198-supp/._198-supp.pdf
- 198-supp/num_train_sample=1673_test=1.mov
- __MACOSX/198-supp/._num_train_sample=1673_test=1.mov
- __MACOSX/._198-supp
